# Supplementary material for: Angiotensin-(1-7) relieves behavioral defects and α-synuclein expression through NEAT1/miR-153-3p axis in Parkinson’s disease
Source: publisher site journal article supplement (doi:10.18632/aging.206028), 2024-10-17
Supplement: Supplementary file [file aging-v16-206028-supplementary-material-SD1.pdf]

## SUPPLEMENTARY TABLE

**Supplementary Table 1. Primer sequences for qRT-PCR.**

| <b>Name</b>    | <b>Sequence</b>                                                       |
|----------------|-----------------------------------------------------------------------|
| mmu-NEAT1      | F: 5'- TTTGCCTAGGTTCCGTGCTT-3'<br>R: 5'- CATCCTCCACAGGCTTACCG -3'     |
| miR-153-3p     | F: 5'- TTGCATAGTCACAAAAGTGATC -3'<br>R:5'- GATCACTTTTGTGACTATGCAA -3' |
| $\beta$ -actin | F: 5'- CCACCATGTACCCAGGCATT-3'<br>R: 5'- CGGACTCATCGTACTCCTGC-3'      |
| U6             | F: 5'-AGAGAAGATTAGCATGGCCCCTGC-3'<br>R: 5'-ATCCAGTGCAGGGTCCGAGG-3'    |
